# Supplementary material for: Doping a metal–organic framework material (ZIF-8) on a perovskite photoconductive detector for improving stability and photoresponsivity
Source: Royal Society of Chemistry journal article supplement (doi:10.1039/d3tc03666a), 2024-01-01
Supplement: d3tc03666a1.pdf [file d3tc03666a1.pdf]

**Supplementary Materials for**

**Doping with Metal-Organic Framework Materials (ZIF-8)**

**on perovskite photoconductive detector for improving**

**stability and photoresponsivity**

Shuo Guan<sup>a,b</sup>, YunHao Ning<sup>a</sup>, Hongda Chen<sup>b,c</sup>, Beiju Huang<sup>b,c</sup>, Bao Zhang<sup>a\*</sup>,  
Chuantong Cheng<sup>b,c\*</sup>.

<sup>a</sup> *School of Chemical Engineering and Technology, Tianjin University, Tianjin 300072, People's Republic of China*

<sup>b</sup> *The State Key Laboratory on Integrated Optoelectronics, Institute of Semiconductors, Chinese Academy of Sciences, Beijing 100083, People's Republic of China*

<sup>c</sup> *College of Materials Science and Opto-Electronic Technology, University of Chinese Academy of Sciences, Beijing 100049, People's Republic of China*

\*Corresponding authors:

chengchuantong@semi.ac.cn (Dr. C. T. Cheng),

baozhang@tju.edu.cn (Dr. B. Zhang)

---

**Figs. S1~S7 and Table S1**

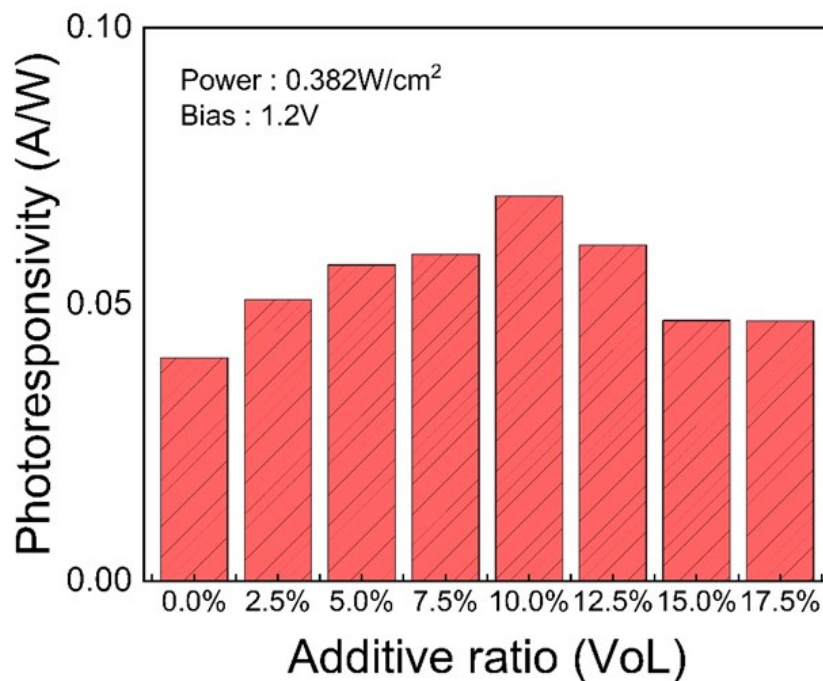

Fig. S1. Relationship between ZIF-8 (5g/mL) addition concentration and photoresponsivity

Table S1 Summary of photoresponsivity of devices with different doping concentrations

| Addition ratio | Photocurrent<br>A      | Photoresponsivity<br>A/W |
|----------------|------------------------|--------------------------|
| 0%             | $1.927 \times 10^{-7}$ | $4.033 \times 10^{-2}$   |
| 2.5%           | $2.431 \times 10^{-7}$ | $5.087 \times 10^{-2}$   |
| 5%             | $2.731 \times 10^{-7}$ | $5.714 \times 10^{-2}$   |
| 7.5%           | $2.824 \times 10^{-7}$ | $5.909 \times 10^{-2}$   |
| 10%            | $3.327 \times 10^{-7}$ | $6.961 \times 10^{-2}$   |
| 12.5%          | $2.901 \times 10^{-7}$ | $6.071 \times 10^{-2}$   |
| 15%            | $2.250 \times 10^{-7}$ | $4.708 \times 10^{-2}$   |
| 17.5%          | $2.245 \times 10^{-7}$ | $4.698 \times 10^{-2}$   |

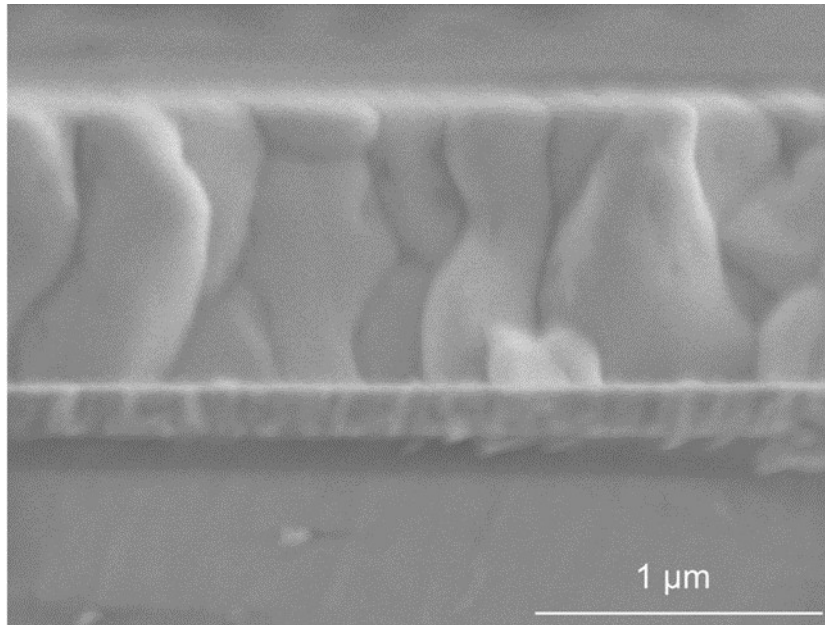

Fig. S2. The cross-sectional SEM images of MAPbI<sub>3</sub> perovskite with ZIF-8

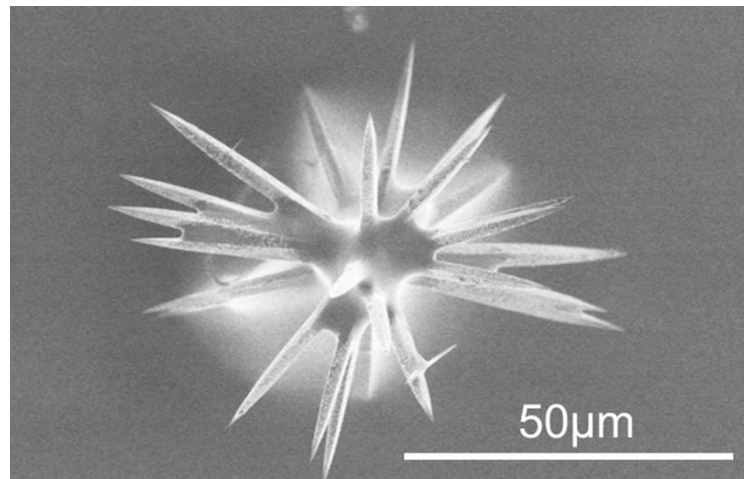

Fig. S3. The SEM images of mixed crystal

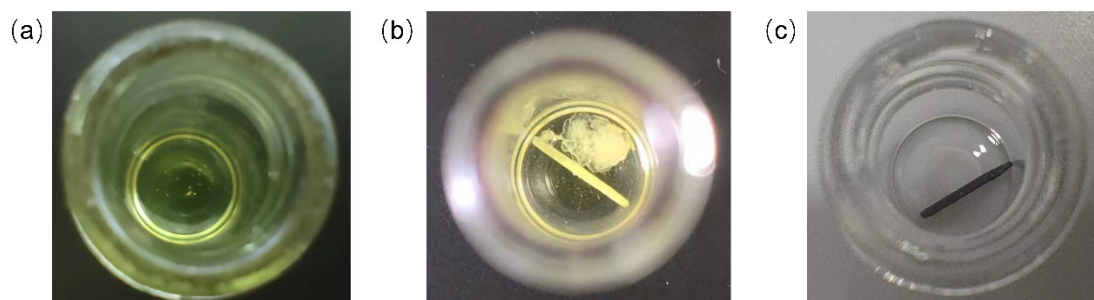

Fig. S4. (a) The perovskite ink without ZIF-8. (b) The perovskite ink with ZIF-8 and needle-shaped crystal. (c) The needle-shaped crystals removed from perovskite ink for 2min without any treatment.

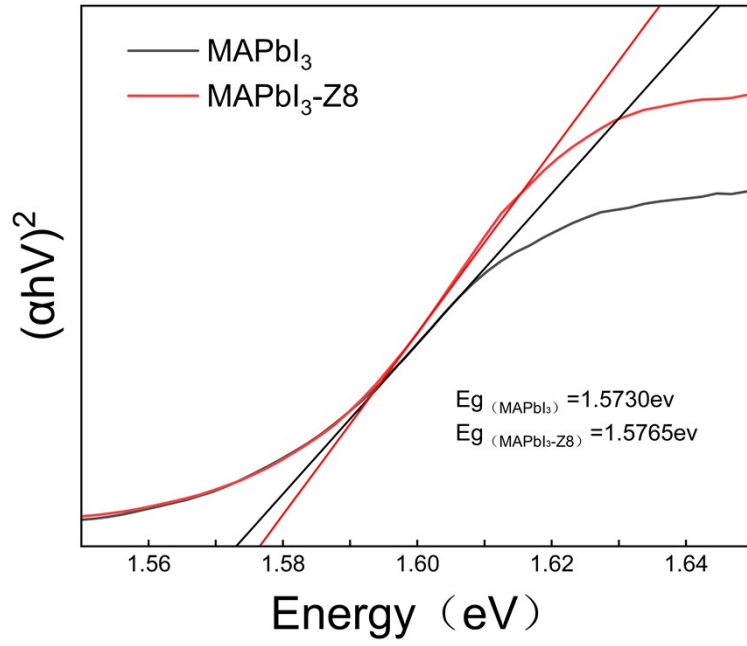

Fig. S5. Optical bandgap estimated for MAPbI<sub>3</sub> and MAPbI<sub>3</sub>-Z8.

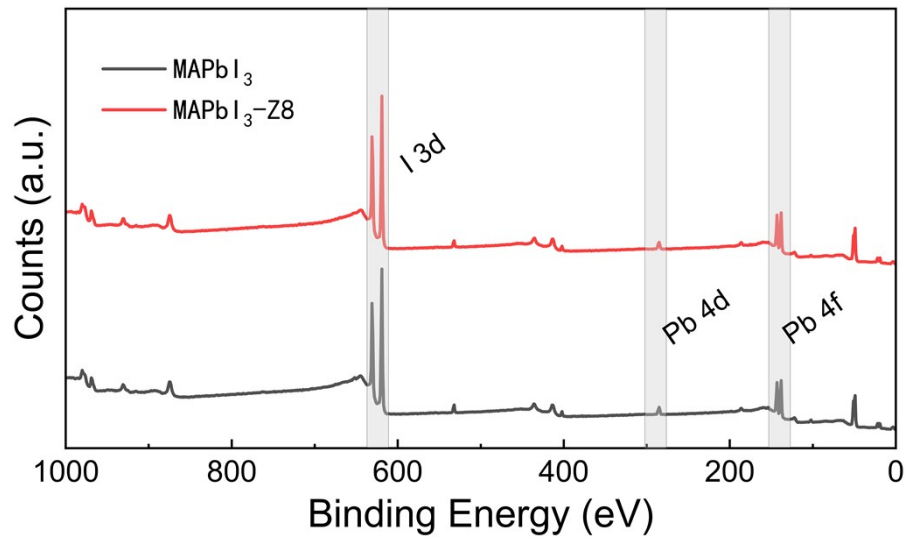

Fig. S6. XPS spectra of MAPbI<sub>3</sub> and MAPbI<sub>3</sub>-Z8 films.

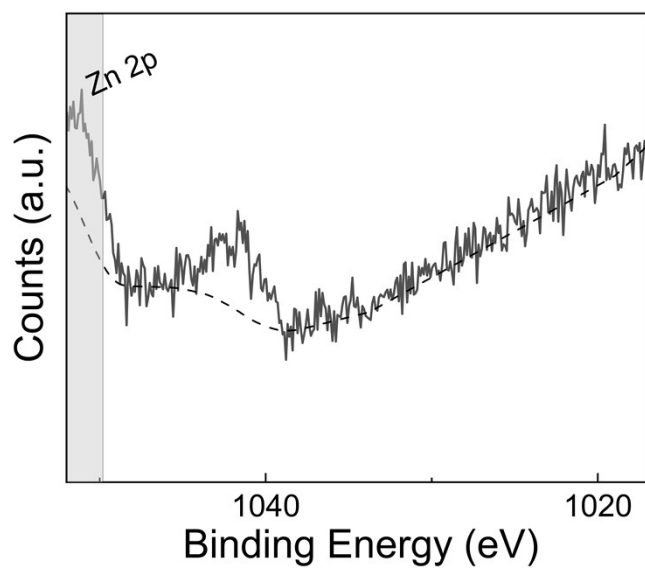

Fig. S7. XPS spectra in Zn  $2p$  regions

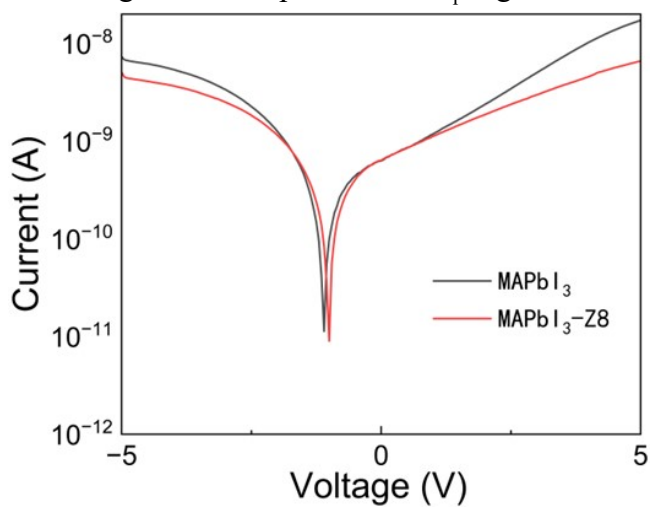

Fig. S8. Logarithm  $I$ - $V$  characteristics of photodetectors with  $\text{MAPbI}_3$  and  $\text{MAPbI}_3\text{-Z8}$  layer in the dark state condition
